# Supplementary material for: Deeper genomic insights into tomato CLE genes repertoire identify new active peptides
Source: PubMed Central journal article supplement (PMC9670457; doi:10.1186/s12864-022-08980-0), 2022-11-17
Supplement: 12864_2022_8980_MOESM1_ESM.pdf [file 12864_2022_8980_MOESM1_ESM.pdf]

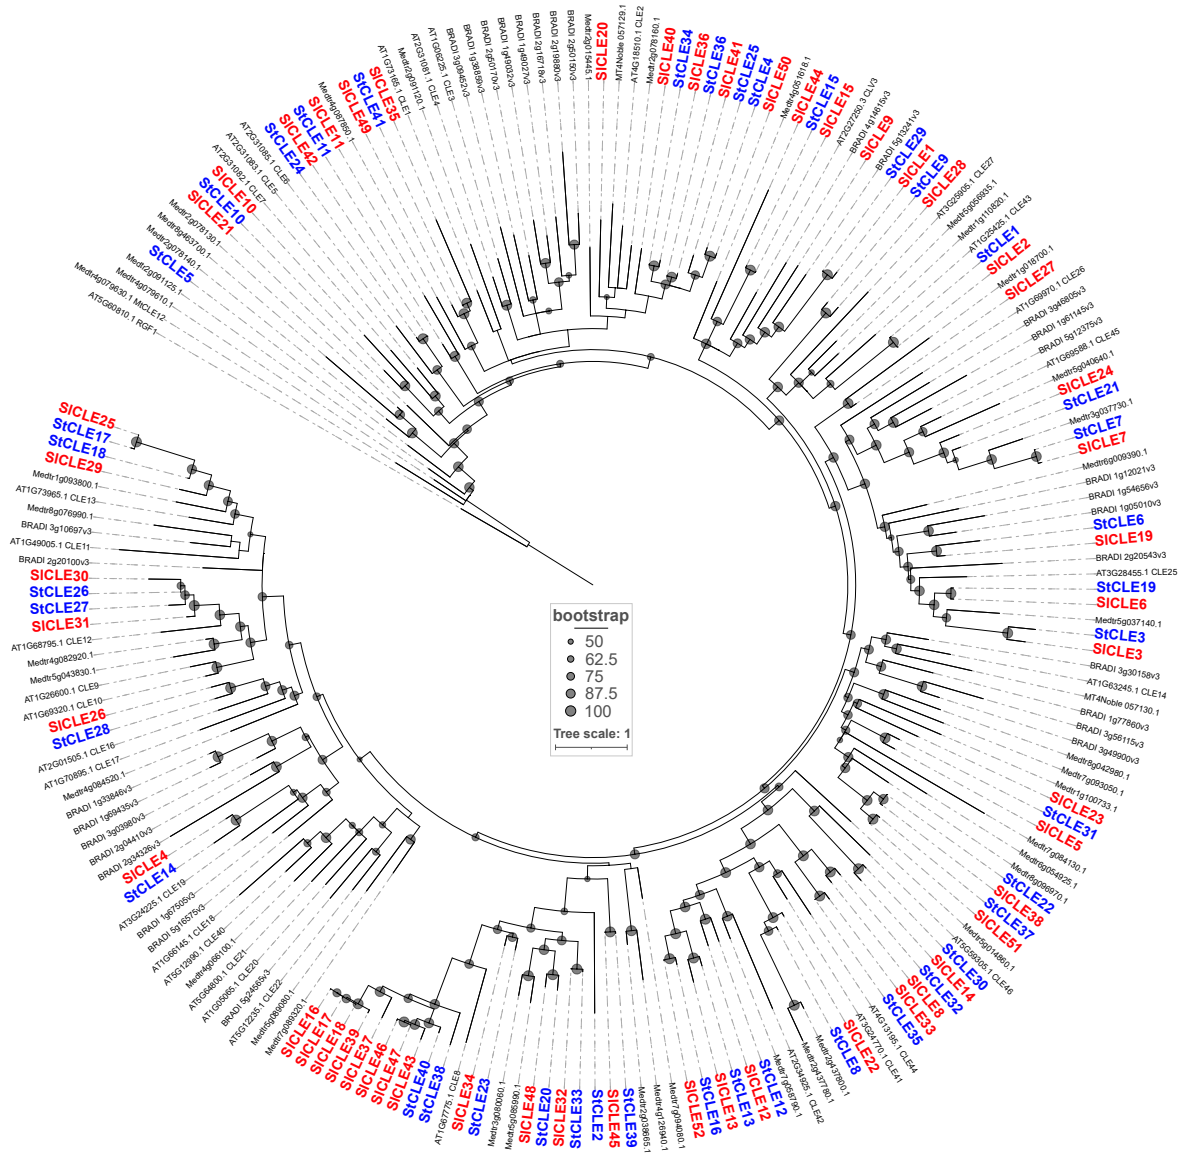

**Supplemental Figure 1. Sequence homology between tomato and potato CLE proteins.** Phylogenetic tree of full-length CLE proteins from tomato (red), potato (blue), *Arabidopsis thaliana*, *Medicago truncatula*, *Brachypodium distachyon*. Nodes supported by bootstrap values superior to 50 are indicated by dots of size proportional to the bootstrap values.

**A**

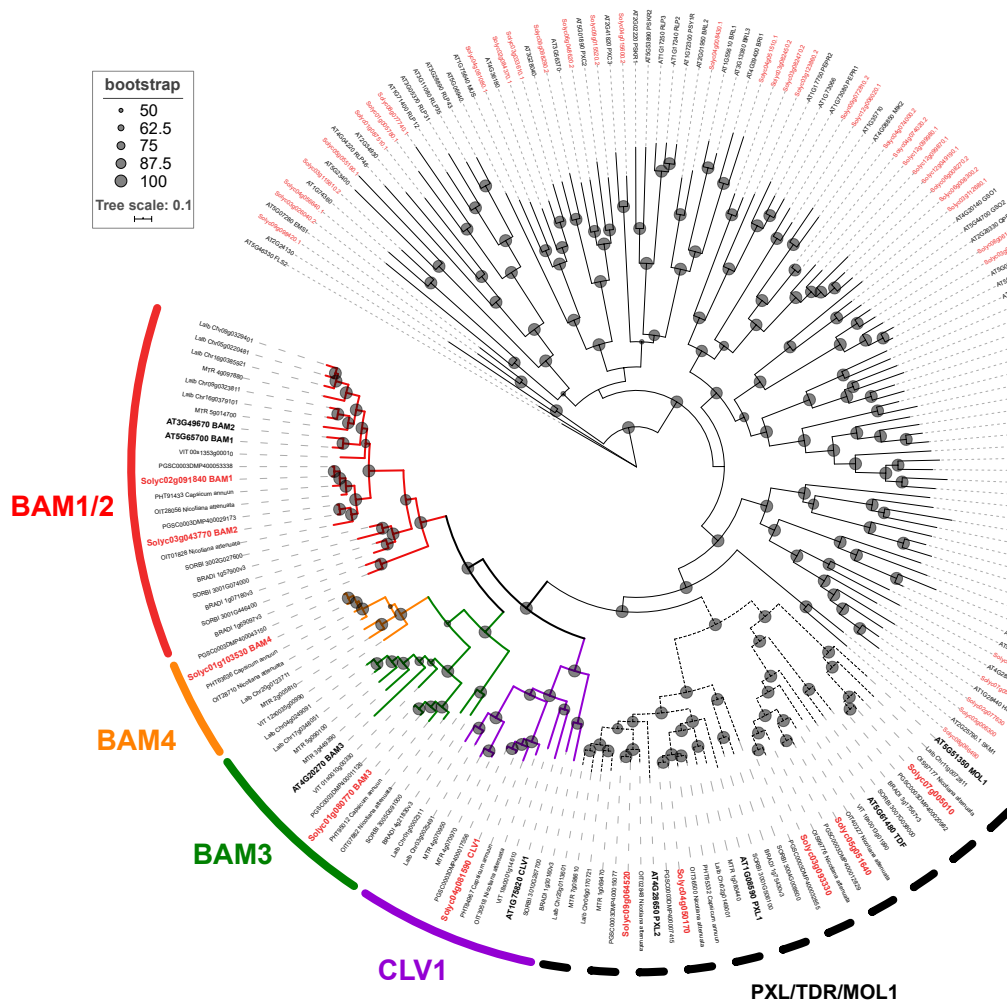

**B**

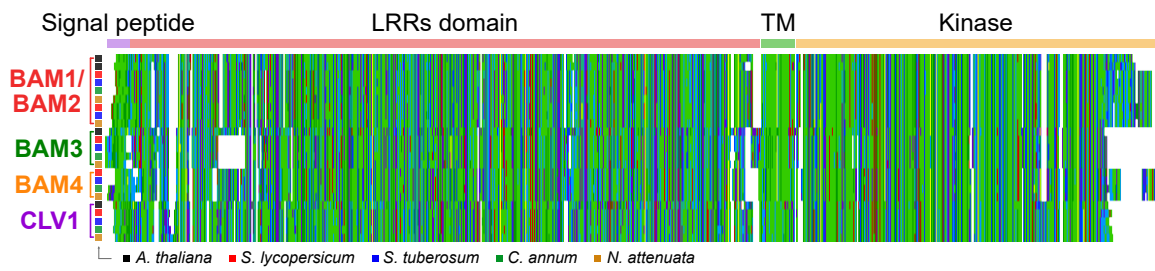

**Supplemental Figure 2. Loss of *BAM4* in Arabidopsis.** **A.** Phylogenetic tree of CLE peptide receptor extracellular domains from tomato, Arabidopsis, potato, *Capsicum annuum*, *Nicotiana attenuata*, *Lupinus albus*, *Medicago truncatula*, *Vitis vinifera*, *Sorghum bicolor* and *Brachypodium distachyon*. Sequences from Arabidopsis and tomato are in bold black and red, respectively. Nodes supported by bootstrap values superior to 50 are indicated by dots of size proportional to the bootstrap values. **B.** Multi-sequence alignment of BAM1/2, BAM3, BAM4 and CLV1 extracellular domains, between Arabidopsis, tomato and three additional representatives of the Solanaceae family.

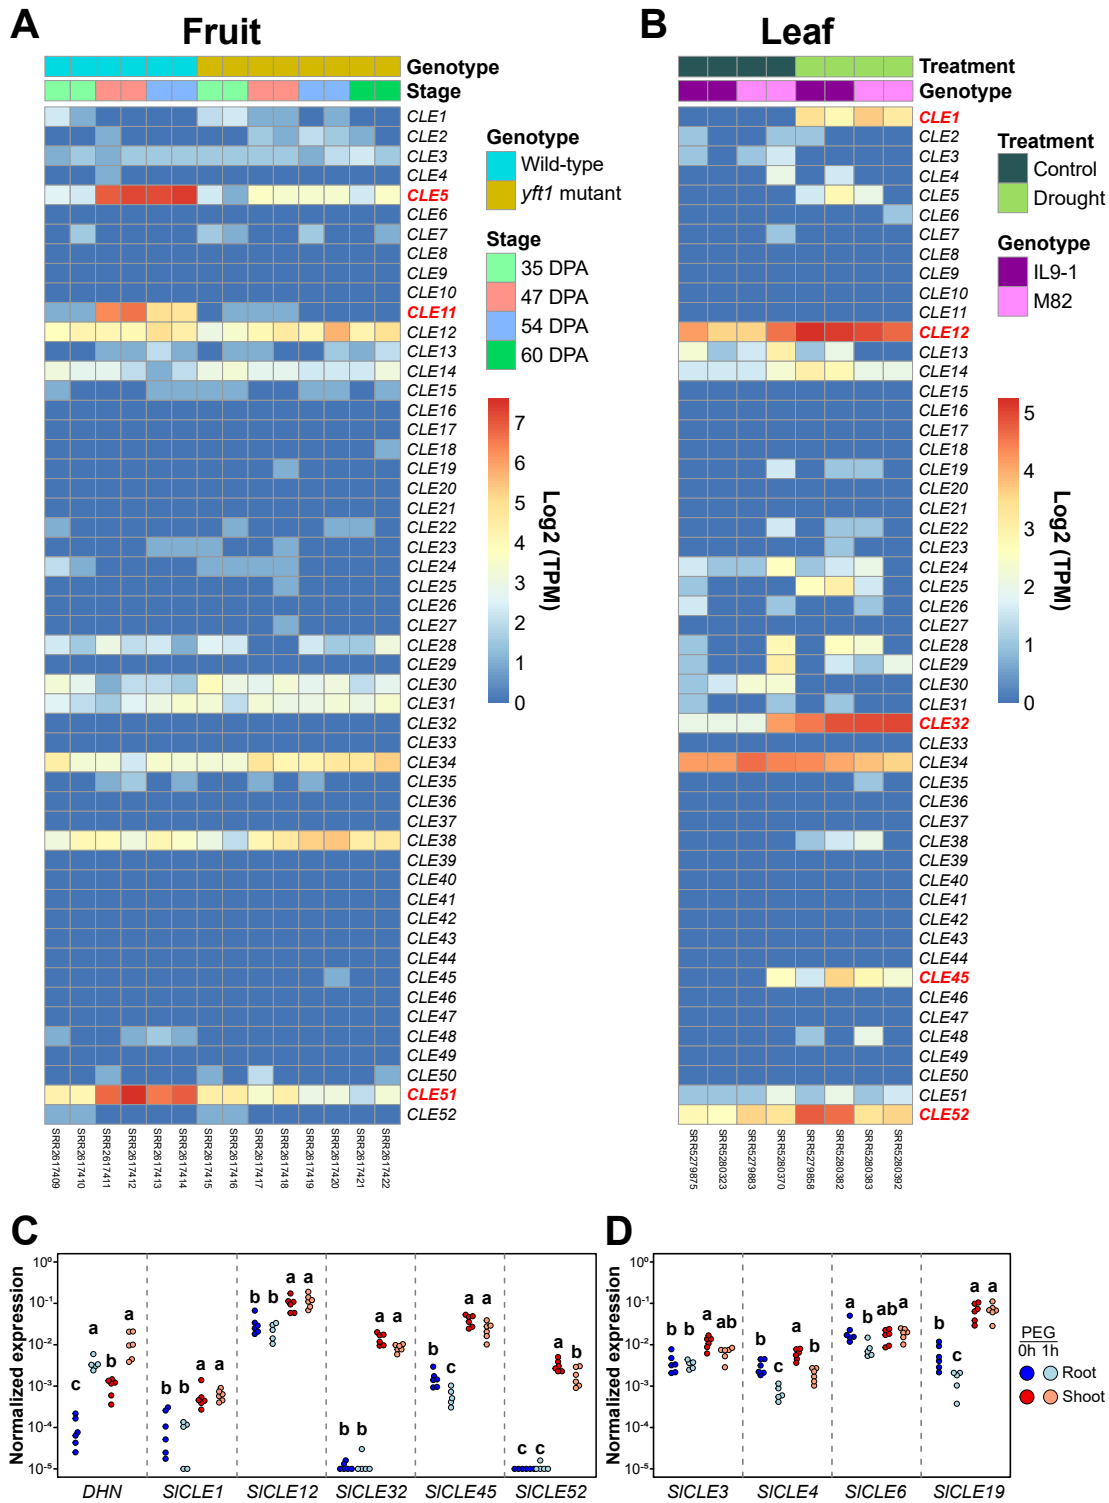

**Supplemental Figure 3. Expression of tomato *CLE* genes in the developing fruit and following drought stress.** **A.** Heatmaps of log (TPM) of *SICLE* genes in the developing fruit at 35, 47, 54, and 60 days post antherisation (DPA), in wilt-type and *yellow fruit tomato1* mutant. Genes in red indicate *SICLE* which are upregulated during fruit maturation in a *yft1* dependent fashion. **B.** Heatmaps of log (TPM) of *SICLE* genes in plant leaves (M82 or a drought tolerant introgression line IL9-1) after a 10 days drought stress in pots. Genes in red indicate *SICLE* which are upregulated by the drought treatment. **C.** Expression analysis by qPCR of selected *SICLE* genes on root and shoot samples from 3 weeks old plants grown in

hydroponic after 1 hour 15% PEG6000 treatment. **D.** Expression analysis of the orthologs of *AtCLE25* in response to osmotic stress induced by the PEG treatment.

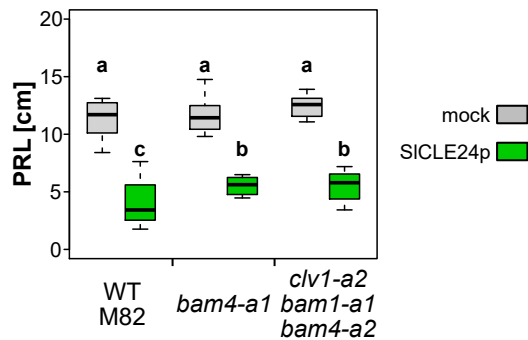

**Supplemental Figure 4.** Effect of SICLE24 peptide on the primary root length (PRL) in wild type (M82) and *clv1bam1bam4* mutant.

### Supplemental Table 1. Primers used in this study.

Table1. qPCR primers.

| Number | Gene           | Sequence                   | Reference                                |
|--------|----------------|----------------------------|------------------------------------------|
| F01    | <i>SActin</i>  | GGTCCTCTCCAGCCATCC         | Zhang et al., BMC 2014                   |
| F02    |                | CCACTGAGCACAATGTTACCG      |                                          |
| H11    | <i>SIDHN</i>   | CACCATGAGGGGCAACAGCA       | Kissoudis et al., Front. Plant Sci. 2017 |
| H12    |                | TCACCTTCATGTTGTCCAGGCATC   |                                          |
| E52    | <i>SICLE1</i>  | TGGTGTCTTTAAGAACTTTTGCTG   | Zhang et al., BMC 2014                   |
| E53    |                | CTCTTTATCTGGAAAATCCCCTT    |                                          |
| E56    | <i>SICLE3</i>  | CTGCTGAGATTTTAGTAAAGCCTG   | Zhang et al., BMC 2014                   |
| E57    |                | GAATGCCCTTCTGTTTCTATTATCC  |                                          |
| F58    | <i>SICLE4</i>  | GGGAAGGGAAGTGGGCTGCCA      | This study                               |
| F59    |                | TGGCATTGGTCCAGTAGGCACT     |                                          |
| E60    | <i>SICLE5</i>  | AACCTCCCCTTCATTACTTCTTC    | Zhang et al., BMC 2014                   |
| E61    |                | ATGATCTGCAGCACCAGCAT       |                                          |
| E62    | <i>SICLE6</i>  | TGGAGGTGTTACAACAAAATGA     | Zhang et al., BMC 2014                   |
| E63    |                | GAACATGATGAGCACCCTTGA      |                                          |
| E74    | <i>SICLE12</i> | TGATGGATATTGATCTCTTGTTGGA  | Zhang et al., BMC 2014                   |
| E75    |                | ATGAATGGTTGGGAAGTGGAT      |                                          |
| E76    | <i>SICLE13</i> | CAATATGCAAGTCCATCACAAAC    | Zhang et al., BMC 2014                   |
| E77    |                | GCCTCCCATAATATTTTCGA       |                                          |
| J08    | <i>SICLE19</i> | CCTAATGGCCAGACCCTAT        | This study                               |
| J09    |                | GGCTTGCCAAATTCTCCTTT       |                                          |
| F62    | <i>SICLE21</i> | TCGTGGAGTCGAGAACATGAGGA    | This study                               |
| F63    |                | GGATCTGGTCTCCAGTGCAA       |                                          |
| F66    | <i>SICLE24</i> | AAGGCTGCTGTCGTGCAAGACC     | This study                               |
| F67    |                | CCCTGCACACTTGATTTGGACTCGC  |                                          |
| F78    | <i>SICLE32</i> | ACCTCTCCAAGATTTCATGTCATCCA | This study                               |
| F79    |                | AATATGACTCTCTTTTCGTGGCGA   |                                          |
| G09    | <i>SICLE40</i> | TGTCCTCCCTCCGAAAGTCGTCC    | This study                               |
| G10    |                | TATCGTTTCCCTCTCCTCCGCG     |                                          |
| G15    | <i>SICLE45</i> | TGAAAACCCCATGAGCCATGACT    | This study                               |
| G16    |                | TCCTCTTGAGAAGAAGCTTCTTTGT  |                                          |
| G25    | <i>SICLE52</i> | ACCACGACCACCACTACTGTCA     | This study                               |
| G26    |                | GCAGCCACCCATATTGCCCTC      |                                          |

**Supplemental Table 2.** Resources and parameters used in this study.

| RESOURCE                                                                                                                                                                                                                                                                                                                                                                                                                                                                                                                                                                                                                                                                                                                                                                                                                                                                                                                                                                                                                                        | SOURCE                                                     | IDENTIFIER                                                                                          |
|-------------------------------------------------------------------------------------------------------------------------------------------------------------------------------------------------------------------------------------------------------------------------------------------------------------------------------------------------------------------------------------------------------------------------------------------------------------------------------------------------------------------------------------------------------------------------------------------------------------------------------------------------------------------------------------------------------------------------------------------------------------------------------------------------------------------------------------------------------------------------------------------------------------------------------------------------------------------------------------------------------------------------------------------------|------------------------------------------------------------|-----------------------------------------------------------------------------------------------------|
| Software and algorithms                                                                                                                                                                                                                                                                                                                                                                                                                                                                                                                                                                                                                                                                                                                                                                                                                                                                                                                                                                                                                         |                                                            |                                                                                                     |
| splitter -size 9000000 -overlap 1000<br>seqretsplit (defaults)<br>degapseq (defaults)                                                                                                                                                                                                                                                                                                                                                                                                                                                                                                                                                                                                                                                                                                                                                                                                                                                                                                                                                           | Rice et al., 2000<br>doi: 10.1016/s0168-9525(00)02024-2    | <a href="https://emboss.sourceforge.net">https://emboss.sourceforge.net</a>                         |
| clustalo --outfmt=fa                                                                                                                                                                                                                                                                                                                                                                                                                                                                                                                                                                                                                                                                                                                                                                                                                                                                                                                                                                                                                            | Sievers et al., 2011<br>doi: 10.1038/msb.2011.75           | <a href="http://www.clustal.org/omega/">http://www.clustal.org/omega/</a>                           |
| hmmbuild (defaults)<br>hmmconvert -2<br>hmmsearch -A --max --incT 4.0<br>hmmalign (defaults)                                                                                                                                                                                                                                                                                                                                                                                                                                                                                                                                                                                                                                                                                                                                                                                                                                                                                                                                                    | Eddy, 2011<br>doi: 10.1371/journal.pcbi.1002195            | <a href="http://hmmer.org">http://hmmer.org</a>                                                     |
| genewise -both -pep -gff -hmmer                                                                                                                                                                                                                                                                                                                                                                                                                                                                                                                                                                                                                                                                                                                                                                                                                                                                                                                                                                                                                 | Birney et al., 2004<br>doi: 10.1101/gr.1865504             | <a href="https://www.ebi.ac.uk/~birney/wise2/">https://www.ebi.ac.uk/~birney/wise2/</a>             |
| bedtools multicov -bams SRR*.bam -bed<br>CLEgenepos.bed > CLEcov.tab.txt                                                                                                                                                                                                                                                                                                                                                                                                                                                                                                                                                                                                                                                                                                                                                                                                                                                                                                                                                                        | Quinlan & Hall, 2010<br>doi: 10.1093/bioinformatics/btq033 | <a href="https://bedtools.readthedocs.io/en/latest/">https://bedtools.readthedocs.io/en/latest/</a> |
| bwa mem -t 24 -M                                                                                                                                                                                                                                                                                                                                                                                                                                                                                                                                                                                                                                                                                                                                                                                                                                                                                                                                                                                                                                | Li & Durbin, 2010<br>doi: 10.1093/bioinformatics/btp698    | <a href="https://bio-bwa.sourceforge.net">https://bio-bwa.sourceforge.net</a>                       |
| samtools view -b -@ 24 -t<br>samtools sort -@ 24 -T<br>samtools index                                                                                                                                                                                                                                                                                                                                                                                                                                                                                                                                                                                                                                                                                                                                                                                                                                                                                                                                                                           | Li et al., 2009<br>doi: 10.1093/bioinformatics/btp352      | <a href="https://www.htslib.org">https://www.htslib.org</a>                                         |
| faToTwoBit (defaults)<br>blat -t=dnax -q=prot -minIdentity=98 -fine                                                                                                                                                                                                                                                                                                                                                                                                                                                                                                                                                                                                                                                                                                                                                                                                                                                                                                                                                                             | Kent, 2002<br>doi:10.1101/gr.229202                        | <a href="https://hgwdev.gi.ucsc.edu/~kent/src/">https://hgwdev.gi.ucsc.edu/~kent/src/</a>           |
| <p>R version 4.2.1 (2022-06-23)<br/>Platform: x86_64-apple-darwin17.0 (64-bit)<br/>Running under: macOS Catalina 10.15.7</p> <p>Matrix products: default<br/>BLAS:/System/Library/Frameworks/Accelerate.framework/Versions/A/Frameworks/vecLib.framework/Versions/A/libBLAS.dylib<br/>LAPACK:/Library/Frameworks/R.framework/Versions/4.2/Resources/lib/libRlapack.dylib</p> <p>locale: fr_CH.UTF-8/fr_CH.UTF-8/fr_CH.UTF-8/C/fr_CH.UTF-8/fr_CH.UTF-8</p> <p>attached base packages:<br/>stats / graphics / grDevices / utils / datasets / methods / base</p> <p>other attached packages:<br/>pheatmap_1.0.12 rlang_1.0.6</p> <p>loaded via a namespace (and not attached):<br/>Rcpp_1.0.9 / plyr_1.8.7 / grid_4.2.1 / R6_2.5.1 / lifecycle_1.0.3 / gtable_0.3.1 / magrittr_2.0.3 / XLConnect_1.0.5 / scales_1.2.1 / stringi_1.7.8 / cli_3.4.1 / reshape2_1.4.4 / farver_2.1.1 / rstudioapi_0.14 / RColorBrewer_1.1.3 / tools_4.2.1 / stringr_1.4.1 / munsell_0.5.0 / compiler_4.2.1 / colorspace_2.0-3 / BiocManager_1.30.18 / rJava_1.0-6</p> |                                                            | <a href="https://cran.r-project.org/">https://cran.r-project.org/</a>                               |
| MegaX_10.1.8 (defaults)                                                                                                                                                                                                                                                                                                                                                                                                                                                                                                                                                                                                                                                                                                                                                                                                                                                                                                                                                                                                                         | Kumar et al., 2018                                         | <a href="https://www.megasoftware.net/">https://www.megasoftware.net/</a>                           |
| IQ-TREE (defaults)                                                                                                                                                                                                                                                                                                                                                                                                                                                                                                                                                                                                                                                                                                                                                                                                                                                                                                                                                                                                                              | Trifinopoulos et al., 2016                                 | <a href="http://iqtree.cibiv.univie.ac.at/">http://iqtree.cibiv.univie.ac.at/</a>                   |

**Supplemental table 3. The extended information about *SICLE* genes.** Can be downloaded as an Excel file.
